# Supplementary material
Source: HighWire-hosted journal article supplement (https://heart.bmj.com/content/105/11/820)

## Supplementary Material

**Table S1 – European society of cardiology quality indicators**

| Number | Domain                        | Type      | Description                                                                                                                                                                                                                                                                                                                                                                                                                                                                                                                                                                                                                                |
|--------|-------------------------------|-----------|--------------------------------------------------------------------------------------------------------------------------------------------------------------------------------------------------------------------------------------------------------------------------------------------------------------------------------------------------------------------------------------------------------------------------------------------------------------------------------------------------------------------------------------------------------------------------------------------------------------------------------------------|
| 1.1    | Centre organisation           | Main      | <p>The centre should be part of a network organisation with written protocols for rapid and efficient management covering the following points:</p> <ul style="list-style-type: none"> <li>• Single emergency phone number for the patient to be connected with a medical system for triage.</li> <li>• Pre-hospital interpretation of ECG for diagnosis and decision for immediate transfer to a centre with catheterisation laboratory facilities.</li> <li>• Pre-hospital activation of the catheterisation laboratory.</li> </ul> <p>Numerator: all centres that are part of a network organisation.<br/>Denominator: all centres.</p> |
| 1.2    | Centre organisation           | Secondary | <p>Routine assessment of relevant times for the reperfusion process in STEMI patients (i.e. times from ‘call to first medical contact’, ‘first medical contact to door’, ‘door to arterial access’; and ‘door-in-door-out’ for centres without a catheterisation laboratory on site).</p> <p>Numerator: all centres with routine assessment of relevant intervals for the reperfusion process.<br/>Denominator: all centres.</p>                                                                                                                                                                                                           |
| 1.3    | Centre organisation           | Secondary | <p>The centre should participate in a regular registry or programme for quality assessment.</p> <p>Numerator: centres participating in a registry.<br/>Denominator: all centres.</p>                                                                                                                                                                                                                                                                                                                                                                                                                                                       |
| 2.1    | Reperfusion-invasive strategy | Main      | <p>Proportion of STEMI patients reperfused among those eligible (onset of symptoms to diagnosis &lt;12 h).</p> <p>Numerator: STEMI patients with onset of symptoms to diagnosis &lt;12 h who receive reperfusion therapy.<br/>Denominator: all STEMI patients eligible for reperfusion (onset of symptoms to diagnosis &lt;12 h, without contraindication or patient refusal).</p>                                                                                                                                                                                                                                                         |
| 2.2    | Reperfusion-invasive strategy | Main      | <p>Proportion of patients with timely reperfusion. Timely is defined as:</p> <ul style="list-style-type: none"> <li>• For patients treated with fibrinolysis: &lt;30 min from First Medical Contact FMC to needle.</li> <li>• For patients treated with primary PCI and admitted to centres with catheterisation laboratory facilities: &lt;60</li> </ul>                                                                                                                                                                                                                                                                                  |

|     |                               |      |                                                                                                                                                                                                                                                                                                                                                                                                                                                       |
|-----|-------------------------------|------|-------------------------------------------------------------------------------------------------------------------------------------------------------------------------------------------------------------------------------------------------------------------------------------------------------------------------------------------------------------------------------------------------------------------------------------------------------|
|     |                               |      | <p>min from door-to-arterial access for reperfusion with PCI.</p> <ul style="list-style-type: none"> <li>• For transferred patients: door-in-door-out time of &lt;30 min.</li> </ul> <p>Numerator: number of STEMI patients treated with primary PCI within the above delays.<br/>Denominator: all STEMI patients eligible for reperfusion by primary PCI (onset of symptoms to diagnosis &lt;12 h, without contraindication or patient refusal).</p> |
| 2.3 | Reperfusion-invasive strategy | Main | <p>Proportion of patients with NSTEMI and no contraindication who receive coronary angiography within 72 h after admission.</p> <p>Numerator: number of NSTEMI patients at high-intermediate ischaemic risk undergoing coronary angiography within 72 h after diagnosis.<br/>Denominator: all NSTEMI patients at high-intermediate ischaemic risk without contraindications or patient refusal.</p>                                                   |
| 2.4 | Reperfusion-invasive strategy | Main | <p>Reperfusion-invasive strategy. Secondary QI (STEMI): The time between the FMC and arterial access (absolute value) for primary PCI.</p>                                                                                                                                                                                                                                                                                                            |
| 3.1 | In-hospital risk assessment   | Main | <p>Proportion of patients with NSTEMI in whom ischaemic risk assessment using the GRACE risk score is performed. GRACE score should be assessed and the numerical value of the score recorded for all patients admitted with suspected NSTEMI.</p> <p>Numerator: number of NSTEMI patients who have been stratified according to the GRACE risk score.<br/>Denominator: number of NSTEMI patients.</p>                                                |
| 3.2 | In-hospital risk assessment   | Main | <p>Proportion of patients admitted with STEMI or NSTEMI who have bleeding risk assessment using the CRUSADE bleeding score. The CRUSADE bleeding score should be assessed and the numerical value of the score recorded for all patients admitted with STEMI or NSTEMI.</p> <p>Numerator: number of STEMI or NSTEMI patients who have been stratified according to CRUSADE bleeding score.<br/>Denominator: number of STEMI or NSTEMI patients.</p>   |
| 3.3 | In-hospital risk assessment   | Main | <p>Proportion of patients with a numerical assessment of LVEF before discharge</p> <p>Numerator: number of AMI patients with measured LVEF.<br/>Denominator: All AMI patients</p>                                                                                                                                                                                                                                                                     |
| 4.1 | Anti-                         | Main | <p>Proportion of patients with 'adequate P2Y<sub>12</sub>-inhibition' defined as: (number of patients discharged with</p>                                                                                                                                                                                                                                                                                                                             |

|     |                                         |           |                                                                                                                                                                                                                                                                                                                                                                                                                                                                                                                                                                                                                                                                                                                                                                                                                                                                                                                                  |
|-----|-----------------------------------------|-----------|----------------------------------------------------------------------------------------------------------------------------------------------------------------------------------------------------------------------------------------------------------------------------------------------------------------------------------------------------------------------------------------------------------------------------------------------------------------------------------------------------------------------------------------------------------------------------------------------------------------------------------------------------------------------------------------------------------------------------------------------------------------------------------------------------------------------------------------------------------------------------------------------------------------------------------|
|     | thrombotics during hospitalisation      |           | <p>prasugrel or ticagrelor or clopidogrel)/(patients eligible).<br/> Eligible is defined as follows:</p> <ul style="list-style-type: none"> <li>• For ticagrelor: AMI patients without previous haemorrhagic stroke, high bleeding risk, fibrinolysis or oral anticoagulation.</li> <li>• For prasugrel: PCI-treated AMI patients without previous haemorrhagic or ischaemic stroke, high bleeding risk (patients <math>\geq 75</math> years and/or <math>&lt; 60</math> kg body weight are also considered as high bleeding risk), fibrinolysis or oral anticoagulation.</li> <li>• For clopidogrel: no indication for prasugrel or ticagrelor and no high bleeding risk.</li> </ul> <p>Numerator: number of STEMI and NSTEMI patients with 'adequate P2Y<sub>12</sub> inhibitor' at discharge.<br/> Denominator: STEMI and NSTEMI patients alive at discharge and without contraindications to P2Y<sub>12</sub> inhibitors</p> |
| 4.2 | Anti-thrombotics during hospitalisation | Main      | <p>Proportion of patients with NSTEMI treated with fondaparinux, unless candidate for immediate (<math>\leq 2</math> h) invasive strategy or with eGFR <math>&lt; 20</math> ml/min.<br/> Numerator: number of NSTEMI patients with eGFR <math>\geq 20</math> ml/min, not candidates for urgent invasive strategy, treated with fondaparinux.<br/> Denominator: all NSTEMI patients with eGFR <math>\geq 20</math> ml/min, not candidates for urgent invasive strategy.</p>                                                                                                                                                                                                                                                                                                                                                                                                                                                       |
| 4.3 | Anti-thrombotics during hospitalisation | Secondary | <p>Proportion of patients discharged on dual antiplatelet therapy, defined as: (number of patients discharged on dual antiplatelet therapy)/(number of patients with AMI without clear and documented contraindication).<br/> Numerator: number of AMI patients, without contraindication, discharged with dual antiplatelet therapy.<br/> Denominator: all AMI patients, without contra indications to dual antiplatelet therapy.</p>                                                                                                                                                                                                                                                                                                                                                                                                                                                                                           |
| 5.1 | Discharge treatment                     | Main      | <p>Proportion of patients with AMI discharged on statins, unless contraindicated<br/> Numerator: the number of patients with AMI who receive high intensity statin therapy at discharge.<br/> Denominator: STEMI and NSTEMI patients alive at discharge and without contraindications, refusal, side effects, allergy, or history of intolerance to high-intensity statin therapy.</p>                                                                                                                                                                                                                                                                                                                                                                                                                                                                                                                                           |
| 5.2 | Discharge treatment                     | Secondary | <p>Proportion of patients with AMI and clinical evidence of heart failure or a LVEF <math>\leq 40\%</math> who are discharged on ACEI (or ARBs if intolerant of ACEI) unless contraindicated<br/> Numerator: the number of patients with AMI who have heart failure or a LVEF <math>\leq 40\%</math>, and who receive an ACEI/ARB before discharge.<br/> Denominator: all AMI patients who have heart failure or a LVEF <math>\leq 40\%</math>, and who are eligible for</p>                                                                                                                                                                                                                                                                                                                                                                                                                                                     |

|     |                      |                   |                                                                                                                                                                                                                                                                                                                                                                                                                                                                                                                                                                                                                                                                                                                                                                                                                                                                                                                                                     |
|-----|----------------------|-------------------|-----------------------------------------------------------------------------------------------------------------------------------------------------------------------------------------------------------------------------------------------------------------------------------------------------------------------------------------------------------------------------------------------------------------------------------------------------------------------------------------------------------------------------------------------------------------------------------------------------------------------------------------------------------------------------------------------------------------------------------------------------------------------------------------------------------------------------------------------------------------------------------------------------------------------------------------------------|
|     |                      |                   | ACEI/ARBs (no hypotension, acute renal failure, hyperkalaemia, contraindications, refusal, side effects or allergy).                                                                                                                                                                                                                                                                                                                                                                                                                                                                                                                                                                                                                                                                                                                                                                                                                                |
| 5.3 | Discharge treatment  | Secondary         | <p>Proportion of patients with AMI and clinical evidence of heart failure or an LVEF&lt;40% who are discharged on beta-blockers, unless contraindicated.</p> <p>Numerator: the number of patients with AMI who have heart failure or a LVEF≤40% and receive a beta-blocker before discharge.</p> <p>Denominator: all AMI patients who have heart failure or a LVEF≤40%, and are eligible for beta-blockers (no evidence of a low output state, increased risk for cardiogenic shock, PR interval &gt;0.24 s, second- or third-degree heart block, active asthma, or reactive airways disease).</p>                                                                                                                                                                                                                                                                                                                                                  |
| 6.1 | Patient satisfaction | Main              | <p>Feedback regarding the patient's experience systematically collected in an organised way from all patients. It should include the following points:</p> <ul style="list-style-type: none"> <li>• Pain control.</li> <li>• Explanations provided by doctors and nurses (about the coronary disease, the benefit/risk of the discharge treatment, and medical follow-up).</li> <li>• Discharge information regarding what to do in case of recurrence of symptoms and recommendation to attend a cardiac rehabilitation programme (including smoking cessation and diet counselling).</li> </ul> <p>Numerator: number of STEMI and NSTEMI patients discharged alive with feedback collected.<br/>Denominator: STEMI and NSTEMI patients discharged alive.</p>                                                                                                                                                                                      |
| 7.1 | Composite QI         | Main composite QI | <p>Opportunity based CQI, with the following individual indicators:</p> <ul style="list-style-type: none"> <li>• The centre is part of a network organisation.</li> <li>• Proportion of patients reperfused among eligible (STEMI with FMC&lt;12 h after onset of pain).</li> <li>• Coronary angiography in STEMI and NSTEMI patients at high ischaemic risk and without contraindications.</li> <li>• Ischaemic risk assessment using the GRACE risk score in NSTEMI patients.</li> <li>• Bleeding risk assessment using the CRUSADE risk score in STEMI and NSTEMI patients.</li> <li>• Assessment of LVEF before discharge.</li> <li>• Low dose aspirin (unless high bleeding risk or oral anticoagulation).</li> <li>• Adequate P2Y<sub>12</sub> inhibition (as defined in the treatment during hospitalisation section).</li> <li>• ACEI (or ARB if intolerant) in patients with clinical evidence of heart failure or an LVEF≤40%.</li> </ul> |

|     |              |                        |                                                                                                                                                                                                                                                                                                                                                                                                                                                                                                                                                                                                                                                                                                                                                                                                                                                                                                                                          |
|-----|--------------|------------------------|------------------------------------------------------------------------------------------------------------------------------------------------------------------------------------------------------------------------------------------------------------------------------------------------------------------------------------------------------------------------------------------------------------------------------------------------------------------------------------------------------------------------------------------------------------------------------------------------------------------------------------------------------------------------------------------------------------------------------------------------------------------------------------------------------------------------------------------------------------------------------------------------------------------------------------------|
|     |              |                        | <ul style="list-style-type: none"> <li>• Beta-blockers (unless clear contraindication) in patients with clinical evidence of heart failure or an LVEF<math>\leq</math>40%.</li> <li>• High intensity statins.</li> <li>• Feedback regarding the patient's experience and quality of care is systematically collected for all patients.</li> </ul> <p>Numerator: all AMI patients discharged: sum of points (one point for each individual indicator, all individual indicators are weighted equally).</p> <p>Denominator: all AMI patients discharged: sum of points (one point for each applicable indicator, according to patient and centre characteristics).</p>                                                                                                                                                                                                                                                                     |
| 7.2 | Composite QI | Secondary composite QI | <p>All-or-none CQI based on 3 or 5 components, according to the LVEF. Calculated on 3 individual QIs in patients without heart failure and with LVEF<math>&gt;</math>40%.</p> <ul style="list-style-type: none"> <li>• Low-dose aspirin.</li> <li>• P2Y<sub>12</sub> inhibitor (unless documented contraindication).</li> <li>• High-intensity statins.</li> </ul> <p>Calculated on 5 individual QIs in patients with heart failure or with LVEF<math>\leq</math>40%.</p> <ul style="list-style-type: none"> <li>• Low-dose aspirin.</li> <li>• P2Y<sub>12</sub> inhibitor (unless documented contraindication).</li> <li>• High-intensity statins.</li> <li>• ACEI (or ARB if intolerant to ACEI) in patients with clinical evidence of heart failure or LVEF<math>\leq</math>40%.</li> <li>• Beta-blockers (unless clear contraindication) in patients with clinical evidence of heart failure or LVEF<math>\leq</math>40%.</li> </ul> |
| 7.3 | Outcome QI   | Secondary outcome QI   | <p>30-day mortality rate adjusted for the GRACE 2.0 risk score.</p> <p>Numerator: all AMI patients who died within 30 days after admission, with assessment of the GRACE risk score.</p> <p>Denominator: all AMI patients with assessment of the GRACE risk score and 30-day follow-up.</p>                                                                                                                                                                                                                                                                                                                                                                                                                                                                                                                                                                                                                                              |

ACEI: angiotensin-converting enzyme inhibitors; AMI: acute myocardial infarction; ARB: angiotensin receptor blocker; CQI: composite quality indicator; ESC: European Society of Cardiology; FMC: first medical contact; LVEF: left ventricular ejection fraction; NSTEMI: non-ST segment elevation myocardial infarction; PCI: percutaneous coronary intervention; QI: quality indicator; STEMI: ST segment elevation myocardial infarction.

**Table S2 – Variable calculation and inclusion**

| No. | Name                                                          | Qualifiers                                                          | Variables used in calculation – MINAP                                                                    | Variables used in calculation- ACSIS                                                                     |
|-----|---------------------------------------------------------------|---------------------------------------------------------------------|----------------------------------------------------------------------------------------------------------|----------------------------------------------------------------------------------------------------------|
| 1.1 | Centre part of a network                                      | Single emergency phone number for patient to be connected to triage | None, assumed 100% by nature STEMI system in UK                                                          | None, assumed 100% by nature STEMI system in Israel                                                      |
|     |                                                               | Pre-hospital interpretation of ECG                                  | ECG performed pre-hospital in patients who were admitted by ambulance                                    | ECG performed pre-hospital in patients who were admitted by ambulance                                    |
|     |                                                               | Pre-hospital activation cath lab                                    | None, assumed 100% by nature STEMI system in UK                                                          | None, assumed 100% by nature STEMI system in Israel                                                      |
| 1.2 | Routine assessment of times to reperfusion for STEMI patients |                                                                     | None, assumed 100% as in MINAP                                                                           | None, assumed 100% in ACSIS                                                                              |
| 1.3 | Participate in regular registry                               |                                                                     | None, assumed 100% as in MINAP                                                                           | None, assumed 100% as in ACSIS                                                                           |
| 2.1 | Proportion of those eligible reperfused within 12hours        |                                                                     | STEMI who present within 12 hours based on symptom time and arrival time                                 | STEMI who present within 12 hours based on symptom time and arrival time                                 |
| 2.2 | Proportion patients with timely reperfusion                   | Lysis within 30mins of diagnosis                                    | Presented within 12 hours, received lysis within 30minutes of arriving in hospital. No contraindications | Presented within 12 hours, received lysis within 30minutes of arriving in hospital. No contraindications |
|     |                                                               | PCI <60mins from admission                                          | Presented within 12 hours, received PCI within 60 minutes of arriving in hospital. No contraindications  | Presented within 12 hours, received PCI within 60 minutes of arriving in hospital. No contraindications  |

|     |                                                        |                                               |                                                                                 |                                                                              |
|-----|--------------------------------------------------------|-----------------------------------------------|---------------------------------------------------------------------------------|------------------------------------------------------------------------------|
|     |                                                        | DIDO time of <30mins for transferred patients | Presented within 12 hours to a non PPCI hospital, discharged within 30 minutes. | Not relevant per hospital system in Israel                                   |
| 2.3 | NSTEMI (angiography within 72 hours)                   |                                               | Received angiography, data on time of angiography, data on time of admission    | Received angiography, data on time of angiography, data on time of admission |
| 2.4 | Median time of reperfusion                             |                                               | Time of reperfusion from arrival time in STEMI patients treated with PPCI       | Time of reperfusion from arrival time in STEMI patients treated with PPCI    |
| 3.1 | GRACE score documented in notes                        |                                               | Not performed                                                                   | Not performed                                                                |
| 3.2 | CRUSADE score documented in notes                      |                                               | Not performed                                                                   | Not performed, no documentation in registry                                  |
| 3.3 | Assessment of LV and numerical value recorded in notes |                                               | Value existing for ejection fraction                                            | Value existing for ejection fraction                                         |
| 4.1 | Adequate P2Y <sub>12</sub>                             |                                               | Excluded patients died in hospital.                                             | Excluded patients died in hospital.                                          |
| 4.2 | NSTEMI patients received fondaparinux                  |                                               | Received fondaparinux, eGFR>20, no angiography within 2 hours of admission      | Received fondaparinux, eGFR>20, no angiography within 2 hours of admission   |
| 4.3 | AMI discharged on DAPT                                 |                                               | Excluded died in hospital. Discharged on both aspirin and P2Y <sub>12</sub>     | Excluded died in hospital. Discharged on both aspirin and P2Y <sub>12</sub>  |
| 5.1 | High intensity statins                                 |                                               | Used statin at discharge as surrogate                                           | Used statin at discharge as surrogate where high-intensity statin data not   |

|     |                                |  |                                                                                                                                                                      |                                                                                                                                                                      |
|-----|--------------------------------|--|----------------------------------------------------------------------------------------------------------------------------------------------------------------------|----------------------------------------------------------------------------------------------------------------------------------------------------------------------|
|     |                                |  |                                                                                                                                                                      | available                                                                                                                                                            |
| 5.2 | HF or EF<40% on an ACE         |  | Excluded died in hospital. Patients with HF and ACE at discharge                                                                                                     | Exclude died in hospital. Patients with HF or otherwise reduced EF receiving ACE at discharge                                                                        |
| 5.3 | HF or EF<40% on a BB           |  | Excluded died in hospital. Patients with HF and beta-blockers at discharge                                                                                           | Excluded died in hospital. Patients with HF and beta-blockers at discharge                                                                                           |
| 6   | Patient satisfaction           |  | Not performed                                                                                                                                                        | Not performed                                                                                                                                                        |
| 7.1 | Composite opportunity          |  | Opportunity score based upon P2Y <sub>12</sub> , statin, aspirin, BB, ACE, ejection fraction, angiography, reperfusion in STEMI patients who present within 12 hours | Opportunity score based upon P2Y <sub>12</sub> , statin, aspirin, BB, ACE, ejection fraction, angiography, reperfusion in STEMI patients who present within 12 hours |
| 7.2 | Composite all or none (non HF) |  | Received aspirin/P2Y <sub>12</sub> /statin if eligible                                                                                                               | Received aspirin/P2Y <sub>12</sub> /statin if eligible                                                                                                               |
|     | Composite all or none (HF)     |  | Received Aspirin/P2Y <sub>12</sub> /statin/BB/ACEI if eligible                                                                                                       | Received aspirin/P2Y <sub>12</sub> /statin/BB/ACEI if eligible                                                                                                       |
| 7.3 | 30-day adjusted mortality      |  | 30 day mortality adjusted for GRACE risk score                                                                                                                       | 30 day mortality adjusted for GRACE risk score                                                                                                                       |

ACEI – Angiotensin converting enzyme antagonists, AMI – acute myocardial infarction, BB- beta-blockers, HF- heart failure, NSTEMI: non-ST segment elevation myocardial infarction; PCI: percutaneous coronary intervention; QI: quality indicator; STEMI: ST segment elevation myocardial infarction.

\*HF/EF based on history of heart failure, loop diuretic use during admission, killip class and ejection fraction variable



**Table S3- Baseline and treatment characteristics**

|                               | Israel         |                |                |                | UK             |                   |                   |                   |
|-------------------------------|----------------|----------------|----------------|----------------|----------------|-------------------|-------------------|-------------------|
|                               | Total cohort   | Years          |                |                | Total cohort   | Years             |                   |                   |
|                               | (n=4761)       | 2006 (n=1731)  | 2010 (n=1539)  | 2013 (n=1491)  | (n=17,608)     | 2006<br>(n=5,171) | 2010<br>(n=6,765) | 2013<br>(n=5,672) |
| Demographics                  |                |                |                |                |                |                   |                   |                   |
| Age in years, mean (SD)       | 63.8 (13.1)    | 63.5 (13.3)    | 63.6 (12.9)    | 64.1 (13.0)    | 69.3 (13.9)    | 70.0 (13.6)       | 68.9 (14.0)       | 69.1 (14.1)       |
| Age in years, median<br>(IQR) | 63 (54.0-74.0) | 63 (53.0-74.0) | 63 (54.0-73.0) | 64 (55.0-74.0) | 70 (59.0-80.0) | 71 (59.0-80.0)    | 70 (59.0-80.0)    | 70 (58.0-80.0)    |
| Female                        | 1059 (22.2)    | 384 (22.2)     | 328 (22.0)     | 347 (22.5)     | 5954 (33.9)    | 1818 (35.3)       | 2240 (33.1)       | 1896 (33.5)       |
| Medical history               |                |                |                |                |                |                   |                   |                   |
| Prior myocardial infarction   | 1366 (28.7)    | 469 (27.1)     | 448 (30.0)     | 449 (29.2)     | 6068 (34.5)    | 1882 (36.4)       | 2351 (34.8)       | 1835 (32.4)*      |
| Hypertension                  | 2946 (61.9)    | 986 (57.1)     | 960 (64.4)     | 1000 (65.0)*   | 8120 (49.5)    | 2388 (48.5)       | 3084 (49.9)       | 2648 (50.0)       |
| Diabetes                      | 1725 (36.3)    | 559 (32.3)     | 556 (37.3)     | 610 (39.6)*    | 3290 (19.6)    | 881 (19.9)        | 1282 (19.9)       | 1127 (20.7)       |
| Dyslipidaemia                 | 3309 (69.5)    | 1076 (62.3)    | 1093 (73.3)    | 1140 (74.1)*   | 5273 (33.0)    | 1451 (30.9)       | 2091 (34.5)       | 1731 (33.2)*      |

|                                |             |             |             |              |              |               |             |              |
|--------------------------------|-------------|-------------|-------------|--------------|--------------|---------------|-------------|--------------|
| Family history of IHD          | 1213 (25.5) | 414 (24.0)  | 417 (28.0)  | 382 (24.8)*  | 4192 (31.3)  | 1186 (33.0)   | 1688 (32.4) | 1318 (28.8)* |
| Smoker (current or previous)   | 2941 (62.5) | 1064 (62.4) | 948 (64.7)  | 929 (60.4)   | 10159 (62.9) | 2990 (64.7)   | 3916 (62.8) | 3253 (61.4)* |
| Peripheral vascular disease    | 429 (9.0)   | 175 (10.1)  | 132 (8.9)   | 122 (7.9)*   | 700 (4.4)    | 220 (4.6)     | 261 (4.3)   | 219 (4.2)    |
| Heart failure                  | 405 (8.5)   | 149 (8.6)   | 134 (9.0)   | 122 (7.9)    | 837 (5.2)    | 256 (5.4)     | 315 (5.1)   | 266 (5.1)    |
| Chronic kidney disease         | 612 (12.9)  | 221 (12.8)  | 181 (12.1)  | 210 (13.6)*  | 897 (5.6)    | 171 (3.6)     | 386 (6.3)   | 340 (6.5)*   |
| Cerebrovascular disease        | 400 (8.4)   | 156 (9.0)   | 119 (8.0)   | 125 ( 8.1)*  | 1375 (8.5)   | 447 (9.4)     | 518 (8.5)   | 410 (7.8)*   |
| Clinical Presentation          |             |             |             |              |              |               |             |              |
| Out of hospital cardiac arrest | 160 (3.4)   | 58 (3.4)    | 42 (2.8)    | 60 (3.9)     | 371 (2.2)    | 83 (1.7)      | 131 (2.0)   | 157 (2.9)*   |
| ST deviation on admission      | 3323 (69.8) | 1260 (72.9) | 1051 (70.5) | 1012 (65.8)* | 9203 (55.0)  | 2824 (58.7)   | 3410 (53.1) | 2969 (53.8)* |
| Killip class                   |             |             |             |              |              |               |             |              |
| I                              | 3946 (84.0) | 1384 (80.1) | 1273 (85.4) | 1289 (87.2)* | 3301 (79.4)  | Not available | 2 (66.7)    | 3299 (79.4)  |
| II                             | 424 (9.0)   | 199 (11.5)  | 115 (7.7)   | 110 (7.4)*   | 571 (13.7)   |               | 0 (0)       | 571 (13.8)   |

|                               |              |              |              |              |              |              |              |              |
|-------------------------------|--------------|--------------|--------------|--------------|--------------|--------------|--------------|--------------|
| III                           | 239 (5.1)    | 115 (6.7)    | 71 (4.8)     | 53 (3.6)*    | 226 (5.4)    |              | 1 (33.3)     | 225 (5.4)    |
| IV                            | 89 (1.9)     | 30 (1.7)     | 32 (2.1)     | 27 (1.8)     | 59 (1.4)     |              | 0 (0)        | 59 (1.4)     |
| GRACE score, mean (SD)        | 110.5 (34.0) | 111.9 (35.2) | 109.4 (33.9) | 110.2 (32.9) | 121.0 (34.4) | 123.6 (31.6) | 120.8 (34.7) | 121.1 (34.2) |
| GRACE STEMI, mean (SD)        | 96.6 (29.3)  | 97.5 (30.6)  | 96.9 (29.7)  | 95.5 (27.5)  | 122.4 (33.6) | 137.1 (31.2) | 122.7 (33.8) | 121.9 (33.3) |
| GRACE NSTEMI, mean (SD)       | 123.1 (33.1) | 123.9 (34.4) | 122.4 (33.0) | 122.8 (31.9) | 120.2 (34.8) | 117.9 (30.3) | 119.9 (35.0) | 120.7 (34.6) |
| Low risk GRACE category       | 2050 (51.7)  | 660 (50.8)   | 720 (53.2)   | 670 (50.9)   | 3913 (43.9)  | 23 (40.4)    | 2062 (43.7)  | 1828 (44.2)  |
| Medium risk GRACE category    | 1078 (27.2)  | 352 (27.1)   | 353 (26.1)   | 373 (28.3)   | 2665 (29.9)  | 21 (36.8)    | 1421 (30.1)  | 1223 (29.5)  |
| High risk GRACE category      | 782 (19.72)  | 277 (21.5)   | 261 (19.6)   | 244 (19.0)   | 2341 (26.3)  | 13 (22.8)    | 1239 (26.2)  | 1089 (26.3)  |
| In-hospital revascularisation |              |              |              |              |              |              |              |              |
| Coronary angiography†         | 4168 (87.6)  | 1439 (83.3)  | 1349 (90.5)  | 1380 (89.7)* | 10218 (64.8) | 1926 (37.3)  | 4316 (72.7)  | 3976 (85.5)* |
| PCI                           | 3344 (70.3)  | 1135 (65.7)  | 1086 (72.8)  | 1123 (73.0)* | 6325 (41.0)  | 711 (14.4)   | 2776 (52.5)  | 2838 (66.0)* |
| CABG surgery                  | 254 (5.3)    | 106 (6.1)    | 64 (4.3)     | 84 (5.5)     | 321 (2.0)    | 75 (1.5)     | 149 (2.5)    | 97 (2.1)*    |
| Medications at discharge      |              |              |              |              |              |              |              |              |

|                             |             |             |             |              |              |             |              |              |
|-----------------------------|-------------|-------------|-------------|--------------|--------------|-------------|--------------|--------------|
| Aspirin                     | 4460 (93.7) | 1606 (92.8) | 1405 (94.2) | 1449 (94.2)  | 12634 (89.1) | 3635 (81.4) | 4853 (91.2)  | 4146 (94.4)* |
| P2Y <sub>12</sub> inhibitor | 3871 (81.3) | 1279 (73.9) | 1269 (85.1) | 1323 (86.0)* | 8762 (62.4)  | 51 (1.1)    | 4731 (91.4)  | 3980 (94.9)* |
| β-blocker                   | 3782 (79.4) | 1387 (80.1) | 1201 (80.5) | 1194 (77.6)  | 11166 (86.5) | 2916 (73.7) | 4,396 (90.3) | 3854 (94.3)* |
| Statin                      | 4458 (93.6) | 1589 (91.8) | 1439 (96.5) | 1430 (92.9)  | 13079 (90.9) | 3916 (85.4) | 4990 (92.7)  | 4173 (94.4)* |
| ACEi/ARB                    | 3625 (76.1) | 1261 (72.8) | 1184 (79.4) | 1180 (76.7)* | 11436 (84.7) | 3210 (74.2) | 4486 (88.7)  | 3740 (91.0)* |

Values are presented as n (%) unless otherwise stated.

ACEi – Angiotensin converting enzyme inhibitor, ARB- angiotensin receptor blocker, IHD- ischaemic heart disease.

IQR- interquartile range, SD- standard deviation, PCI- percutaneous coronary intervention

\* Denotes p<0.05 compared to 2006.

**Table S4 – Quality indicators according to year and country**

| QI                                                 | QI Type | Israel        |               |               | United Kingdom |                |                |
|----------------------------------------------------|---------|---------------|---------------|---------------|----------------|----------------|----------------|
|                                                    |         | Cohort 1      | Cohort 2      | Cohort 3      | Cohort 1       | Cohort 2       | Cohort 3       |
|                                                    |         | 2006 (n=1731) | 2010 (n=1539) | 2013 (n=1491) | 2006 (n=5,171) | 2010 (n=6,765) | 2013 (n=5,672) |
| 2.1: Proportion reperfused within 12 hours (STEMI) | Main    | 581 (96.2)    | 555 (96.0)    | 595 (95.0)    | 1141 (84.6)    | 1492 (90.8)    | 1405 (91.7)*   |
| 2.2: STEMI timely reperfusion                      | Main    | 236 (42.1)    | 299 (56.6)    | 294 (54.0)*   | 600 (50.6)     | 1017 (60.6)    | 1133 (72.3)*   |
| 2.2a: fibrinolysis (<30 minutes)                   |         | 19 (14.6)     | 7 (46.7)      | 10 (71.4)*    | 595 (50.6)     | 214 (52.2)     | 22 (45.8)      |
| 2.2b: Primary PCI (<60 minutes)                    |         | 213 (50.5)    | 214 (56.9)    | 246 (53.6)    | 5 (50.0)       | 803 (66.3)     | 1111 (74.9)    |
| 2.3: NSTEMI                                        | Main    | 334 (59.4)    | 416 (81.2)    | 506 (78.1)*   | 79 (37.4)      | 292 (53.0)     | 358 (57.9)*    |

|                                                     |           |               |               |               |               |              |               |
|-----------------------------------------------------|-----------|---------------|---------------|---------------|---------------|--------------|---------------|
| angiography <72 hours                               |           |               |               |               |               |              |               |
| 2.3: NSTEMI angiography <72 hours (no HR features)  | Main      | 227 (67.0)    | 295 (87.5)    | 341 (83.8)*   | 224 (41.7)    | 742 (58.9)   | 820 (64.1)*   |
| 2.4: arterial access (STEMI), minutes (median, IQR) | Secondary | 70.3 (43-115) | 66.5 (39-111) | 67.0 (35-107) | 80.4 (30-165) | 46.2 (31-71) | 40.2 (29-60)* |
| 3.3: Assessment of LV function recorded in notes    | Main      | 1522 (87.9)   | 1181 (79.2)   | 1112 (72.3)*  | 1111 (22.1)   | 2550 (40.0)  | 2731 (50.1)*  |
| 4.1: Proportion with adequate                       | Main      | 1279 (77.3)   | 1269 (86.5)   | 1323 (86.3)*  | 51 (1.1)      | 4731 (91.4)  | 3980 (94.9)*  |

|                                                   |           |             |             |              |             |              |               |
|---------------------------------------------------|-----------|-------------|-------------|--------------|-------------|--------------|---------------|
| P2Y <sub>12</sub> inhibition<br>on discharge      |           |             |             |              |             |              |               |
| 4.2: Proportion<br>NSTEMI getting<br>fondaparinux | Main      | 0 (0)       | 0 (0)       | 46 (2.4)     | 0 (0)       | 562 (14.5)   | 1549 (49.5)*  |
| 4.3: Proportion<br>discharged on<br>DAPT          | Secondary | 1255 (72.2) | 1242 (83.0) | 1294 (83.4)* | 47 (1.1)    | 4,477 (88.9) | 3,819 (93.5)* |
| 5.1: Proportion<br>discharged with<br>statins     | Main      | 1589 (92.4) | 1439 (96.6) | 1430 (93.0)  | 3916 (85.4) | 4990 (92.7)  | 4173 (94.4)*  |
| 5.2: ACEI/ARB in<br>those with HF or<br>EF ≤40    | Secondary | 232 (83.1)  | 189 (84.9)  | 160 (82.9)   | 1024 (77.3) | 1473 (89.1)  | 1416 (92.0)*  |

|                                                               |           |            |            |            |            |             |             |
|---------------------------------------------------------------|-----------|------------|------------|------------|------------|-------------|-------------|
| 5.3: $\beta$ - blocker in those with HF or EF $\leq$ 40       | Secondary | 239 (85.0) | 194 (88.8) | 158 (81.9) | 845 (72.7) | 1469 (91.9) | 1499 (96.8) |
| 7.1: Main Composite QI (opportunity-based)                    |           | 86.8       | 88.2       | 85.9       | 46.2       | 74.7        | 80.0*       |
| 7.2: Composite QI (all or none, overall score)                |           | 70.2       | 81.4       | 78.0*      | 1.0        | 81.6        | 85.8*       |
| 7.2a: Composite QI (all or none, 3 measures) <sup>1</sup> , % |           | 73.5       | 83.2       | 79.7*      | 51.0       | 88.2        | 93.0*       |
| 7.2b: Composite                                               |           | 54.0       | 70.9       | 65.5*      | 1.1        | 83.3        | 88.9*       |



|                                               |  |      |     |      |      |      |      |
|-----------------------------------------------|--|------|-----|------|------|------|------|
| QI (all or none, 5 measures) <sup>1</sup> , % |  |      |     |      |      |      |      |
| 7.3 Mortality at 30-days adjusted for GRACE   |  | 5.1  | 4.7 | 4.2* | 8.1  | 7.7  | 7.6* |
| Crude mortality rate at 30-days               |  | 5.3  | 5   | 3.8* | 11.0 | 7.5  | 7.8* |
| Crude mortality at 1 year                     |  | 10.9 | 9.5 | 8.6  | 22.0 | 16.4 | 10.1 |

ACEI: angiotensin-converting enzyme inhibitors; ARB: angiotensin receptor blocker; DAPT- dual anti-platelet therapy; EF: ejection fraction;

LV: left ventricle; NSTEMI: non-ST segment elevation myocardial infarction; PCI: percutaneous coronary intervention; QI- quality indicator;

STEMI: ST segment elevation myocardial infarction

**Table S5: Missing data**

|                                | ACSIS | MINAP |
|--------------------------------|-------|-------|
| Age                            | 0     | 38    |
| Female, n (%)                  | 3     | 32    |
| History of IHD                 | 3     | 0     |
| Hypertension                   | 3     | 1,216 |
| Diabetes                       | 3     | 822   |
| Dyslipidaemia                  | 3     | 1,642 |
| Family history of IHD          | 3     | 4,229 |
| Smoker (current or previous)   | 53    | 1,452 |
| Peripheral vascular disease    | 3     | 1,512 |
| Congestive cardiac failure     | 3     | 837   |
| COPD                           | 3     | 2,421 |
| Chronic kidney disease         | 3     | 897   |
| Cerebrovascular disease        | 3     | 1,441 |
| Out of hospital cardiac arrest | 0     | 794   |

|                             | ACSIS | MINAP  |
|-----------------------------|-------|--------|
| ST deviation on admission   | 0     | 865    |
| Killip class                | 63    | 12,703 |
| GRACE score                 | 141   | 8,689  |
| Angiogram                   | 3     | 1,434  |
| PCI                         | 3     | 1,943  |
| CABG                        | 3     | 1,943  |
| Aspirin                     | 95    | 257    |
| P2Y <sub>12</sub> inhibitor | 101   | 5,707  |
| β-blocker                   | 96    | 270    |
| Statin                      | 15    | 272    |
| ACEI/ARB                    | 77    | 257    |

Numbers represent counts. ACEI – Angiotensin converting enzyme inhibitors, ARB- angiotensin receptor antagonist, CABG – coronary artery bypass grafting COPD- chronic obstructive pulmonary disease, IHD – ischemic heart disease, PCI- percutaneous coronary intervention;

**Table S6: Comparison of registry characteristics**

| Characteristic           | MINAP                                                                    | ACSIS                                                    |
|--------------------------|--------------------------------------------------------------------------|----------------------------------------------------------|
| Country                  | United Kingdom                                                           | Israel                                                   |
| Registry type            | Continuous                                                               | Snapshot                                                 |
| Total number of patients | 930,358 (2003-13)                                                        | 13434 up to 2013                                         |
| Cases included           | All cases of suspected acute coronary syndrome admitted to UK hospitals. | Consecutive patients over 2 month period every 2-3 years |
| Main funder              | Health Quality Involvement Partnership on behalf Department of Health    | IACT                                                     |
| Adjudication             | By treating physicians                                                   | By treating physician                                    |
| Validation               | Each centre undergoes annual validation, re-entering                     | Cases are selected randomly for re-examination           |

|                                |                                                                     |                                                                                                                              |
|--------------------------------|---------------------------------------------------------------------|------------------------------------------------------------------------------------------------------------------------------|
| Outcome monitoring             | All-cause mortality via linkage with Office for National Statistics | All 30-day outcomes by physician and by patient contact. Follow-up data is compared with HMO and national mortality registry |
| Definition of STEMI            | According to ESC guidelines                                         | According to ESC guidelines                                                                                                  |
| Definition of NSTEMI           | According to ESC guidelines;                                        | According to ESC guidelines;<br>Necessitates rise in cardiac Troponin and adjudication of treating cardiologist              |
| Ensuring case completion       | MINAP monitors 20 key fields for completeness                       | Survey is not completed until follow-up is entered for all patients                                                          |
| Incentives for data collection | None, costs of local data entry                                     | Collection done by                                                                                                           |

|  |                                  |                                                            |
|--|----------------------------------|------------------------------------------------------------|
|  | borne by participating hospitals | cardiologists that receive compensation for completed form |
|--|----------------------------------|------------------------------------------------------------|

ACSIS - acute coronary syndrome Israel survey, IACT – Israeli association for cardiovascular trials, ESC- European Society of Cardiology,

HMO – health maintenance organization, MINAP – myocardial ischemia national audit project

**Table S7 – Selected quality indicators in MINAP patients with missing mortality data**

| Year                                                                 | 2006           | 2010       | 2013       |
|----------------------------------------------------------------------|----------------|------------|------------|
| QI2.1 Received reperfusion if eligible and presented within 12 hours | 21 (87.5)      | 42 (95.5)  | 118 (88.1) |
| QI 2.2 Received timely reperfusion                                   | 17 (77.3)      | 2 (50)     | 0 (0)      |
| QI 3.3 EF documented within the notes                                | 22 (24.0)      | 72 (61.0)  | 200 (43.3) |
| QI 4.1 Received P2Y <sub>12</sub>                                    | 47 (54.7)      | 94 (93.1)  | 341 (91.4) |
| QI 2.4 Revascularization time (mins)                                 | 777 (74-1,476) | 47 (31-76) | 52 (29-65) |
| QI 4.3 DAPT received                                                 | 43 (50)        | 92 (92)    | 311(86.2)  |
| QI5.1 Statin received                                                | 77 (90.6)      | 98 (95.2)  | 355 (92.0) |
| QI5.2 ACEI received if either EF<40% or HF                           | 15 (71.4)      | 27 (90)    | 125 (89.3) |
| QI 5.3 BB received if either EF<40% or HF                            | 16 (100)       | 30 (90.9)  | 139 (93.9) |

|                                      |                 |                  |                 |
|--------------------------------------|-----------------|------------------|-----------------|
| QI 7.1 proportion , percent (+/- SD) | 61.3% (+/-23.6) | 84.5% (+/- 23.5) | 76.6% (+/-26.0) |
|--------------------------------------|-----------------|------------------|-----------------|

Data is N (%) unless otherwise stated. ACEI: angiotensin-converting enzyme inhibitors; DAPT- dual antiplatelet therapy; EF: ejection fraction.



## **1 Description of health systems and design factors influencing treatment**

**Israel** – the state provides National Health Insurance (NHI) which is universal and compulsory for all, funded by the government. Within the NHI a resident can choose one of four countrywide healthcare providers. The hospitals and their coronary care units are owned by the government or healthcare providers. The government defines a “health basket” which defines the medication and procedures that are funded and provided. Hospitalization for acute care and all necessary treatment including catheterization is provided free without co-payment. Drugs given after hospital discharge are subject to subsidized co-payment. Private health insurance and providers are available but are not used for acute cardiac care. Hospitals are reimbursed for care by healthcare providers according to length of stay but for urgent care, not by volume of procedures.

Clopidogrel was approved by the health basket in 1997

Newer P2Y<sub>12</sub> inhibitors came under the health basket in 2012

Performance of catheterization for NSTEMI is decided by treating physicians, with no specific financial incentive

No specific directives exist regarding care under specific risk (or GRACE score) or age or sex.

**United Kingdom**- the National Health Service (NHS) is entrusted with provision of healthcare, under which coverage is universal for all. Funding for NHS care is by the government, and is generally free at point of access, including ambulance services and A&E care. Hospitalization for acute care and all necessary treatment including

catheterization is provided free without any requirement for payment. Drugs given after hospital discharge are subject to subsidized payment, with certain populations (e.g age over 60 years , those with certain long term conditions) exempt from this payment.

Guidelines are defined by the National Institute for Health and Care Excellence. They recommend treatments based on their cost effectiveness.

Clopidogrel was not used throughout the NHS until 2007.

Newer P2Y<sub>12</sub> inhibitors such as Ticagrelor were used since 2013

The decision on whether to perform angiography lies with the treating physician and team.

There are no specific guidelines regarding the treatment for those identified at specific risk (or GRACE score) or age or sex, other than the ESC guidelines.

## **2 Expanded methods**

### **Adjustment for GRACE**

For the mortality adjusted to GRACE scores, we used the predicted probabilities derived from a logistic regression model where the dependent variable was 30-day mortality and the independent variable was each patient's calculated GRACE risk score. For both cohorts, the GRACE score was calculated using the mini-GRACE methodology which has been previously validated with MINAP data[18]. This method allows for the substitution of 'use of loop diuretic' for Killip class and chronic renal failure in lieu of creatinine concentration for those records with missing

information. Specifically, for ACSIS, GRACE scores were recalculated from the raw data to ensure compatibility with the MINAP GRACE risk score method.

The score performance was re-validated in the ACSIS cohort against actual observed mortality. The GRACE score had high discrimination value of with a c-statistic of 0.85. The  $R^2$  was 0.25. Brier Score was 0.06

The validation of mini-GRACE was presented by Simms<sup>1</sup>, where it had a c-statistic of 0.84,  $R^2$ , and a Brier score of 0.09, and  $R^2$  of 0.22. For the current cohort, the GRACE score had a c-statistic of 0.79.

1 Simms AD, Reynolds S, Pieper K, et al Evaluation of the NICE mini-GRACE risk scores for acute myocardial infarction using the Myocardial Ischaemia National Audit Project (MINAP) 2003–2009: National Institute for Cardiovascular Outcomes Research (NICOR) Heart 2013;99:35-40.

**Figure S1 – Calibration plot and performance indices of GRACE score against actual probability of death**

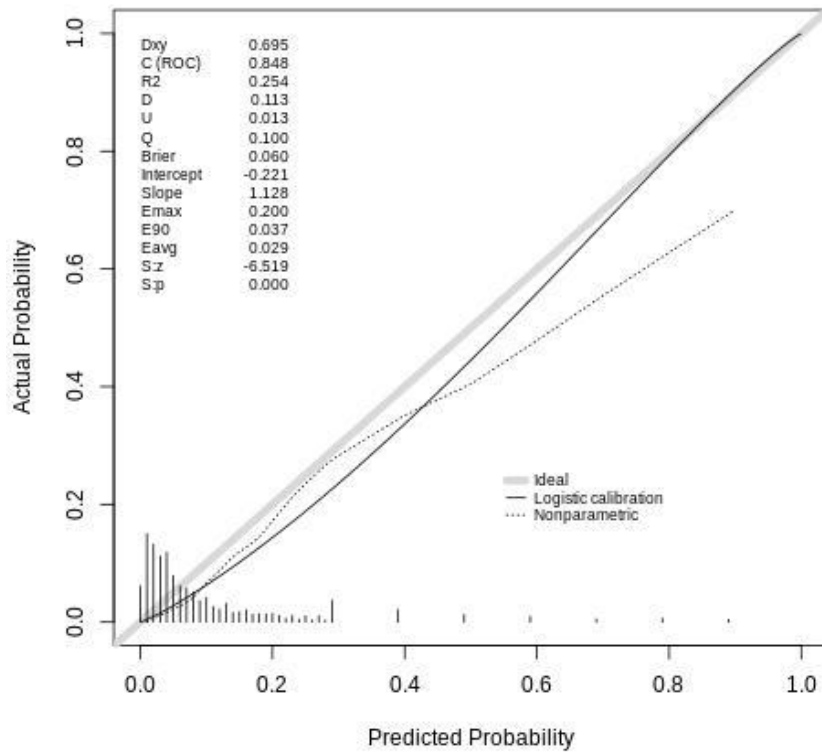

Supplement: inline-supplementary-material-1 [file inline-supplementary-material-1.pdf]
